# Supplementary material for: Evaluating Paeonia Radix Alba quality by multidimensional quantified fingerprinting combined with antioxidant profiling
Source: Royal Society of Chemistry journal article supplement (doi:10.1039/d3nj01587d), 2023-01-01
Supplement: d3nj01587d1.pdf [file d3nj01587d1.pdf]

## Supplementary Information

### **Evaluating *Paeonia Radix Alba* quality by Multidimensional Quantified Fingerprint combined with antioxidant profiling**

Lu Chen<sup>a</sup>, Jiajia Fan<sup>a</sup>, Xiang Li<sup>a</sup>, Lili Lan<sup>a,\*</sup>, Zhe Wang<sup>a,\*</sup>, Guoxiang Sun<sup>a,\*</sup>

<sup>a</sup> School of Pharmacy, Shenyang Pharmaceutical University, Shenyang, Liaoning  
110016, China

## Catalogue

|                                                                                 |   |
|---------------------------------------------------------------------------------|---|
| Support Information Tables .....                                                | 3 |
| Table 1 TQ values for different experimental conditions of HPLC.....            | 3 |
| Table 2 The calibration curves, linear range, LOQ and LOD for four markers .... | 3 |

Support Information Tables

Table 1 TQ values for different experimental conditions of HPLC

| Para | EX1   | EX2   | EX3   | T1    | T2    | T3    | MPP1  | MPP2 | MPP3  |
|------|-------|-------|-------|-------|-------|-------|-------|------|-------|
| TQ   | 200.6 | 204.6 | 195.8 | 204.6 | 205.2 | 205.8 | 111.8 | 114  | 113.9 |

Table 2 The calibration curves, linear range, LOQ and LOD for four markers

| Compound | Calibration curve | <i>r</i> | Linear range(ug/mL) | <i>LOQ</i> (ug) | <i>LOD</i> (ng) |
|----------|-------------------|----------|---------------------|-----------------|-----------------|
| GAC      | y=35.313x+52.468  | 0.999    | 27.05-270.48        | 0.005           | 0.322           |
| PGL      | y=7.0278x+121.7   | 0.999    | 78.79-787.92        | 0.046           | 13.679          |
| BPA      | y=22.391x+54.924  | 1.000    | 17.25-172.48        | 0.018           | 5.390           |
| PAE      | y=8.5124x+1118.7  | 0.999    | 439.04-4390.4       | 0.126           | 37.589          |
